# Supplementary material
Source: publisher figshare collection journal article supplement (https://acs.figshare.com/ndownloader/files/5174461)
Supplement: Supplementary file 1 [file 5174461]

data_i5
 
_audit_creation_method            SHELXL-97
_chemical_name_systematic
;
 ?
;
_chemical_name_common             ?
_chemical_melting_point           ?
_chemical_formula_moiety          ?
_chemical_formula_sum
 'C22 H27 B2 N'
_chemical_formula_weight          327.07
 
loop_
 _atom_type_symbol
 _atom_type_description
 _atom_type_scat_dispersion_real
 _atom_type_scat_dispersion_imag
 _atom_type_scat_source
 'C'  'C'   0.0033   0.0016
 'International Tables Vol C Tables 4.2.6.8 and 6.1.1.4'
 'H'  'H'   0.0000   0.0000
 'International Tables Vol C Tables 4.2.6.8 and 6.1.1.4'
 'N'  'N'   0.0061   0.0033
 'International Tables Vol C Tables 4.2.6.8 and 6.1.1.4'
 'B'  'B'   0.0013   0.0007
 'International Tables Vol C Tables 4.2.6.8 and 6.1.1.4'
 
_symmetry_cell_setting            ?
_symmetry_space_group_name_H-M    ?
 
loop_
 _symmetry_equiv_pos_as_xyz
 'x, y, z'
 '-x, y, -z+1/2'
 'x+1/2, y+1/2, z'
 '-x+1/2, y+1/2, -z+1/2'
 '-x, -y, -z'
 'x, -y, z-1/2'
 '-x+1/2, -y+1/2, -z'
 'x+1/2, -y+1/2, z-1/2'
 
_cell_length_a                    20.924(7)
_cell_length_b                    11.808(5)
_cell_length_c                    7.700(3)
_cell_angle_alpha                 90.00
_cell_angle_beta                  99.47(3)
_cell_angle_gamma                 90.00
_cell_volume                      1876.5(12)
_cell_formula_units_Z             4
_cell_measurement_temperature     173(2)
_cell_measurement_reflns_used     ?
_cell_measurement_theta_min       ?
_cell_measurement_theta_max       ?
 
_exptl_crystal_description        ?
_exptl_crystal_colour             ?
_exptl_crystal_size_max           0.16
_exptl_crystal_size_mid           0.10
_exptl_crystal_size_min           0.08
_exptl_crystal_density_meas       ?
_exptl_crystal_density_diffrn     1.158
_exptl_crystal_density_method     'not measured'
_exptl_crystal_F_000              704
_exptl_absorpt_coefficient_mu     0.065
_exptl_absorpt_correction_type    none
_exptl_absorpt_correction_T_min   0.9898
_exptl_absorpt_correction_T_max   0.9949
_exptl_absorpt_process_details    ?
 
_exptl_special_details
;
 ?
;
 
_diffrn_ambient_temperature       173(2)
_diffrn_radiation_wavelength      0.71073
_diffrn_radiation_type            MoK\a
_diffrn_radiation_source          'fine-focus sealed tube'
_diffrn_radiation_monochromator   graphite
_diffrn_measurement_device_type   ?
_diffrn_measurement_method        ?
_diffrn_detector_area_resol_mean  ?
_diffrn_standards_number          ?
_diffrn_standards_interval_count  ?
_diffrn_standards_interval_time   ?
_diffrn_standards_decay_%         ?
_diffrn_reflns_number             3725
_diffrn_reflns_av_R_equivalents   0.0305
_diffrn_reflns_av_sigmaI/netI     0.0580
_diffrn_reflns_limit_h_min        -27
_diffrn_reflns_limit_h_max        27
_diffrn_reflns_limit_k_min        -15
_diffrn_reflns_limit_k_max        13
_diffrn_reflns_limit_l_min        -9
_diffrn_reflns_limit_l_max        9
_diffrn_reflns_theta_min          3.43
_diffrn_reflns_theta_max          27.49
_reflns_number_total              2136
_reflns_number_gt                 1497
_reflns_threshold_expression      >2sigma(I)
 
_computing_data_collection        ?
_computing_cell_refinement        ?
_computing_data_reduction         ?
_computing_structure_solution     ?
_computing_structure_refinement   'SHELXL-97 (Sheldrick, 1997)'
_computing_molecular_graphics     ?
_computing_publication_material   ?
 
_refine_special_details
;
 Refinement of F^2^ against ALL reflections.  The weighted R-factor wR and
 goodness of fit S are based on F^2^, conventional R-factors R are based
 on F, with F set to zero for negative F^2^. The threshold expression of
 F^2^ > 2sigma(F^2^) is used only for calculating R-factors(gt) etc. and is
 not relevant to the choice of reflections for refinement.  R-factors based
 on F^2^ are statistically about twice as large as those based on F, and R-
 factors based on ALL data will be even larger.
;
 
_refine_ls_structure_factor_coef  Fsqd
_refine_ls_matrix_type            full
_refine_ls_weighting_scheme       calc
_refine_ls_weighting_details
 'calc w=1/[\s^2^(Fo^2^)+(0.0541P)^2^+0.6265P] where P=(Fo^2^+2Fc^2^)/3'
_atom_sites_solution_primary      direct
_atom_sites_solution_secondary    difmap
_atom_sites_solution_hydrogens    geom
_refine_ls_hydrogen_treatment     mixed
_refine_ls_extinction_method      none
_refine_ls_extinction_coef        ?
_refine_ls_number_reflns          2136
_refine_ls_number_parameters      117
_refine_ls_number_restraints      0
_refine_ls_R_factor_all           0.0763
_refine_ls_R_factor_gt            0.0457
_refine_ls_wR_factor_ref          0.1214
_refine_ls_wR_factor_gt           0.1061
_refine_ls_goodness_of_fit_ref    1.011
_refine_ls_restrained_S_all       1.011
_refine_ls_shift/su_max           0.000
_refine_ls_shift/su_mean          0.000
 
loop_
 _atom_site_label
 _atom_site_type_symbol
 _atom_site_fract_x
 _atom_site_fract_y
 _atom_site_fract_z
 _atom_site_U_iso_or_equiv
 _atom_site_adp_type
 _atom_site_occupancy
 _atom_site_symmetry_multiplicity
 _atom_site_calc_flag
 _atom_site_refinement_flags
 _atom_site_disorder_assembly
 _atom_site_disorder_group
N1 N 0.0000 -0.09114(12) 0.2500 0.0270(4) Uani 1 2 d S . .
C1 C 0.03440(6) 0.10609(11) 0.24158(16) 0.0261(3) Uani 1 1 d . . .
C2 C 0.07665(6) 0.19136(11) 0.23090(17) 0.0275(3) Uani 1 1 d . . .
H2 H 0.0615 0.2673 0.2273 0.033 Uiso 1 1 calc R . .
C3 C 0.14505(6) 0.16973(11) 0.22477(17) 0.0273(3) Uani 1 1 d . . .
C4 C 0.16797(7) 0.06298(12) 0.22365(18) 0.0314(3) Uani 1 1 d . . .
H4 H 0.2132 0.0541 0.2256 0.038 Uiso 1 1 calc R . .
C5 C 0.12803(7) -0.04316(12) 0.21953(19) 0.0331(4) Uani 1 1 d . . .
H5A H 0.1474 -0.0933 0.3172 0.040 Uiso 1 1 calc R . .
H5B H 0.1294 -0.0837 0.1076 0.040 Uiso 1 1 calc R . .
C6 C 0.18921(7) 0.27147(12) 0.22392(17) 0.0308(3) Uani 1 1 d . . .
H6 H 0.2346 0.2427 0.2325 0.037 Uiso 1 1 calc R . .
C7 C 0.17325(8) 0.33856(13) 0.0523(2) 0.0434(4) Uani 1 1 d . . .
H7A H 0.2035 0.4020 0.0544 0.052 Uiso 1 1 calc R . .
H7B H 0.1289 0.3677 0.0401 0.052 Uiso 1 1 calc R . .
H7C H 0.1771 0.2890 -0.0475 0.052 Uiso 1 1 calc R . .
C8 C 0.18709(8) 0.34901(13) 0.3819(2) 0.0418(4) Uani 1 1 d . . .
H8A H 0.2222 0.4046 0.3901 0.050 Uiso 1 1 calc R . .
H8B H 0.1923 0.3036 0.4898 0.050 Uiso 1 1 calc R . .
H8C H 0.1453 0.3885 0.3669 0.050 Uiso 1 1 calc R . .
C9 C 0.0000 -0.21226(15) 0.2500 0.0275(4) Uani 1 2 d S . .
C10 C 0.03869(7) -0.27256(12) 0.15194(18) 0.0328(3) Uani 1 1 d . . .
H10 H 0.0653 -0.2330 0.0835 0.039 Uiso 1 1 calc R . .
C11 C 0.03876(8) -0.38998(12) 0.15325(19) 0.0379(4) Uani 1 1 d . . .
H11 H 0.0658 -0.4301 0.0867 0.046 Uiso 1 1 calc R . .
C12 C 0.0000 -0.44924(17) 0.2500 0.0377(5) Uani 1 2 d S . .
H12 H 0.0000 -0.5297 0.2500 0.045 Uiso 1 2 calc SR . .
B1 B 0.05557(7) -0.01901(13) 0.23633(19) 0.0265(4) Uani 1 1 d . . .
 
loop_
 _atom_site_aniso_label
 _atom_site_aniso_U_11
 _atom_site_aniso_U_22
 _atom_site_aniso_U_33
 _atom_site_aniso_U_23
 _atom_site_aniso_U_13
 _atom_site_aniso_U_12
N1 0.0367(10) 0.0188(8) 0.0261(8) 0.000 0.0066(7) 0.000
C1 0.0293(7) 0.0235(7) 0.0252(7) -0.0008(5) 0.0036(5) 0.0012(5)
C2 0.0298(7) 0.0221(7) 0.0307(7) 0.0003(6) 0.0057(5) 0.0020(6)
C3 0.0282(8) 0.0276(8) 0.0266(7) 0.0002(5) 0.0053(5) 0.0004(6)
C4 0.0287(8) 0.0298(8) 0.0362(8) -0.0003(6) 0.0070(6) 0.0035(6)
C5 0.0380(9) 0.0238(7) 0.0380(8) 0.0003(6) 0.0076(6) 0.0039(6)
C6 0.0271(7) 0.0285(7) 0.0381(8) -0.0012(6) 0.0090(6) -0.0007(6)
C7 0.0488(10) 0.0361(9) 0.0478(10) 0.0062(7) 0.0153(7) -0.0052(7)
C8 0.0373(9) 0.0410(9) 0.0479(10) -0.0093(7) 0.0096(7) -0.0111(7)
C9 0.0395(11) 0.0195(9) 0.0223(9) 0.000 0.0017(8) 0.000
C10 0.0449(9) 0.0248(7) 0.0302(7) -0.0004(6) 0.0103(6) -0.0019(6)
C11 0.0529(10) 0.0266(8) 0.0354(8) -0.0051(6) 0.0101(7) 0.0037(7)
C12 0.0544(14) 0.0197(10) 0.0379(12) 0.000 0.0045(10) 0.000
B1 0.0329(9) 0.0240(8) 0.0226(7) -0.0003(6) 0.0042(6) 0.0005(6)
 
_geom_special_details
;
 All esds (except the esd in the dihedral angle between two l.s. planes)
 are estimated using the full covariance matrix.  The cell esds are taken
 into account individually in the estimation of esds in distances, angles
 and torsion angles; correlations between esds in cell parameters are only
 used when they are defined by crystal symmetry.  An approximate (isotropic)
 treatment of cell esds is used for estimating esds involving l.s. planes.
;
 
loop_
 _geom_bond_atom_site_label_1
 _geom_bond_atom_site_label_2
 _geom_bond_distance
 _geom_bond_site_symmetry_2
 _geom_bond_publ_flag
N1 C9 1.430(2) . ?
N1 B1 1.4590(18) . ?
N1 B1 1.4590(18) 2 ?
C1 C2 1.3514(19) . ?
C1 C1 1.466(3) 2 ?
C1 B1 1.545(2) . ?
C2 C3 1.462(2) . ?
C3 C4 1.3492(19) . ?
C3 C6 1.5163(19) . ?
C4 C5 1.504(2) . ?
C5 B1 1.569(2) . ?
C6 C8 1.529(2) . ?
C6 C7 1.530(2) . ?
C9 C10 1.3906(17) 2 ?
C9 C10 1.3906(17) . ?
C10 C11 1.386(2) . ?
C11 C12 1.3789(18) . ?
C12 C11 1.3789(18) 2 ?
 
loop_
 _geom_angle_atom_site_label_1
 _geom_angle_atom_site_label_2
 _geom_angle_atom_site_label_3
 _geom_angle
 _geom_angle_site_symmetry_1
 _geom_angle_site_symmetry_3
 _geom_angle_publ_flag
C9 N1 B1 125.71(8) . . ?
C9 N1 B1 125.71(8) . 2 ?
B1 N1 B1 108.57(16) . 2 ?
C2 C1 C1 131.84(8) . 2 ?
C2 C1 B1 121.17(12) . . ?
C1 C1 B1 106.99(7) 2 . ?
C1 C2 C3 121.71(12) . . ?
C4 C3 C2 120.95(12) . . ?
C4 C3 C6 121.51(13) . . ?
C2 C3 C6 117.53(11) . . ?
C3 C4 C5 125.58(13) . . ?
C4 C5 B1 112.83(12) . . ?
C3 C6 C8 111.94(11) . . ?
C3 C6 C7 111.56(12) . . ?
C8 C6 C7 110.26(13) . . ?
C10 C9 C10 118.39(18) 2 . ?
C10 C9 N1 120.80(9) 2 . ?
C10 C9 N1 120.80(9) . . ?
C11 C10 C9 120.54(13) . . ?
C12 C11 C10 120.75(14) . . ?
C11 C12 C11 119.01(19) . 2 ?
N1 B1 C1 108.72(12) . . ?
N1 B1 C5 133.82(13) . . ?
C1 B1 C5 117.46(12) . . ?
 
loop_
 _geom_torsion_atom_site_label_1
 _geom_torsion_atom_site_label_2
 _geom_torsion_atom_site_label_3
 _geom_torsion_atom_site_label_4
 _geom_torsion
 _geom_torsion_site_symmetry_1
 _geom_torsion_site_symmetry_2
 _geom_torsion_site_symmetry_3
 _geom_torsion_site_symmetry_4
 _geom_torsion_publ_flag
C1 C1 C2 C3 176.38(16) 2 . . . ?
B1 C1 C2 C3 -3.8(2) . . . . ?
C1 C2 C3 C4 2.2(2) . . . . ?
C1 C2 C3 C6 -176.41(12) . . . . ?
C2 C3 C4 C5 3.1(2) . . . . ?
C6 C3 C4 C5 -178.29(12) . . . . ?
C3 C4 C5 B1 -6.0(2) . . . . ?
C4 C3 C6 C8 -122.61(15) . . . . ?
C2 C3 C6 C8 56.03(17) . . . . ?
C4 C3 C6 C7 113.30(15) . . . . ?
C2 C3 C6 C7 -68.06(15) . . . . ?
B1 N1 C9 C10 146.45(10) . . . 2 ?
B1 N1 C9 C10 -33.55(10) 2 . . 2 ?
B1 N1 C9 C10 -33.55(10) . . . . ?
B1 N1 C9 C10 146.45(10) 2 . . . ?
C10 C9 C10 C11 -0.37(10) 2 . . . ?
N1 C9 C10 C11 179.63(10) . . . . ?
C9 C10 C11 C12 0.7(2) . . . . ?
C10 C11 C12 C11 -0.37(10) . . . 2 ?
C9 N1 B1 C1 -179.99(6) . . . . ?
B1 N1 B1 C1 0.01(6) 2 . . . ?
C9 N1 B1 C5 -0.38(18) . . . . ?
B1 N1 B1 C5 179.62(18) 2 . . . ?
C2 C1 B1 N1 -179.89(11) . . . . ?
C1 C1 B1 N1 -0.03(16) 2 . . . ?
C2 C1 B1 C5 0.43(18) . . . . ?
C1 C1 B1 C5 -179.71(13) 2 . . . ?
C4 C5 B1 N1 -175.55(12) . . . . ?
C4 C5 B1 C1 4.03(17) . . . . ?
 
_diffrn_measured_fraction_theta_max    0.993
_diffrn_reflns_theta_full              27.49
_diffrn_measured_fraction_theta_full   0.993
_refine_diff_density_max    0.186
_refine_diff_density_min   -0.172
_refine_diff_density_rms    0.037

#===END


data_cal0402


_audit_creation_method            SHELXL-97

_chemical_name_systematic

;

 ?

;

_chemical_name_common             ?

_chemical_melting_point           ?

_chemical_formula_moiety          ?

_chemical_formula_sum             'C41 H65 B2 Li2 N5'

_chemical_formula_weight          663.48


loop_

 _atom_type_symbol

 _atom_type_description

 _atom_type_scat_dispersion_real

 _atom_type_scat_dispersion_imag

 _atom_type_scat_source

 'C'  'C'   0.0033   0.0016

 'International Tables Vol C Tables 4.2.6.8 and 6.1.1.4'

 'H'  'H'   0.0000   0.0000

 'International Tables Vol C Tables 4.2.6.8 and 6.1.1.4'

 'Li'  'Li'  -0.0003   0.0001

 'International Tables Vol C Tables 4.2.6.8 and 6.1.1.4'

 'B'  'B'   0.0013   0.0007

 'International Tables Vol C Tables 4.2.6.8 and 6.1.1.4'

 'N'  'N'   0.0061   0.0033

 'International Tables Vol C Tables 4.2.6.8 and 6.1.1.4'


_symmetry_cell_setting            Monoclinic

_symmetry_space_group_name_H-M    'P 21/n'


loop_

 _symmetry_equiv_pos_as_xyz

 'x, y, z'

 '-x+1/2, y+1/2, -z+1/2'

 '-x, -y, -z'

 'x-1/2, -y-1/2, z-1/2'


_cell_length_a                    18.9342(14)

_cell_length_b                    11.7733(9)

_cell_length_c                    19.3032(15)

_cell_angle_alpha                 90.00

_cell_angle_beta                  101.2639(18)

_cell_angle_gamma                 90.00

_cell_volume                      4220.1(6)

_cell_formula_units_Z             4

_cell_measurement_temperature     193(2)

_cell_measurement_reflns_used     2105

_cell_measurement_theta_min       2.21

_cell_measurement_theta_max       25.81


_exptl_crystal_description        fragment

_exptl_crystal_colour             yellow

_exptl_crystal_size_max           0.27

_exptl_crystal_size_mid           0.21

_exptl_crystal_size_min           0.20

_exptl_crystal_density_meas       0

_exptl_crystal_density_diffrn     1.044

_exptl_crystal_density_method     'not measured'

_exptl_crystal_F_000              1448

_exptl_absorpt_coefficient_mu     0.060

_exptl_absorpt_correction_type    multi-scan

_exptl_absorpt_correction_T_min   0.9841

_exptl_absorpt_correction_T_max   0.9882

_exptl_absorpt_process_details    'SADABS (Sheldrick, 1996)'


_exptl_special_details

;

 ?

;


_diffrn_ambient_temperature       193(2)

_diffrn_radiation_wavelength      0.71073

_diffrn_radiation_type            MoK\a

_diffrn_radiation_source          'fine-focus sealed tube'

_diffrn_radiation_monochromator   graphite

_diffrn_measurement_device_type

 'Bruker PLATFORM diffractometer/SMART 1000 CCD area detector'

_diffrn_measurement_method        '\w scans'

_diffrn_detector_area_resol_mean  8.192

_diffrn_standards_number          0

_diffrn_standards_interval_time   0

_diffrn_standards_decay_%         0

_diffrn_reflns_number             28615

_diffrn_reflns_av_R_equivalents   0.1179

_diffrn_reflns_av_sigmaI/netI     0.1087

_diffrn_reflns_limit_h_min        -23

_diffrn_reflns_limit_h_max        22

_diffrn_reflns_limit_k_min        -14

_diffrn_reflns_limit_k_max        14

_diffrn_reflns_limit_l_min        -24

_diffrn_reflns_limit_l_max        23

_diffrn_reflns_theta_min          1.38

_diffrn_reflns_theta_max          26.41

_reflns_number_total              8627

_reflns_number_gt                 3649

_reflns_threshold_expression      I>2\s(I)


_computing_data_collection        'Bruker SMART (Bruker, 1997)'

_computing_cell_refinement        'Bruker SAINT (Bruker, 1997)'

_computing_data_reduction         'Bruker SAINT (Bruker, 1997)'

_computing_structure_solution     'SHELXS-97 (Sheldrick, 1990)'

_computing_structure_refinement   'SHELXL-97 (Sheldrick, 1997)'

_computing_molecular_graphics     'Bruker SHELXTL (Bruker, 1997)'

_computing_publication_material   'Bruker SHELXTL (Bruker, 1997)'


_refine_special_details

;

 Refinement of F^2^ against ALL reflections.  The weighted R-factor wR and

 goodness of fit S are based on F^2^, conventional R-factors R are based

 on F, with F set to zero for negative F^2^. The threshold expression of

 F^2^ > 2sigma(F^2^) is used only for calculating R-factors(gt) etc. and is

 not relevant to the choice of reflections for refinement.  R-factors based

 on F^2^ are statistically about twice as large as those based on F, and R-

 factors based on ALL data will be even larger.

;


_refine_ls_structure_factor_coef  Fsqd

_refine_ls_matrix_type            full

_refine_ls_weighting_scheme       calc

_refine_ls_weighting_details

 'calc w=1/[\s^2^(Fo^2^)+(0.1085P)^2^+0.0000P] where P=(Fo^2^+2Fc^2^)/3'

_atom_sites_solution_primary      direct

_atom_sites_solution_secondary    difmap

_atom_sites_solution_hydrogens    geom

_refine_ls_hydrogen_treatment     constr

_refine_ls_extinction_method      none

_refine_ls_extinction_coef        ?

_refine_ls_number_reflns          8627

_refine_ls_number_parameters      452

_refine_ls_number_restraints      0

_refine_ls_R_factor_all           0.1887

_refine_ls_R_factor_gt            0.0727

_refine_ls_wR_factor_ref          0.2342

_refine_ls_wR_factor_gt           0.1733

_refine_ls_goodness_of_fit_ref    0.976

_refine_ls_restrained_S_all       0.976

_refine_ls_shift/su_max           0.002

_refine_ls_shift/su_mean          0.000


loop_

 _atom_site_label

 _atom_site_type_symbol

 _atom_site_fract_x

 _atom_site_fract_y

 _atom_site_fract_z

 _atom_site_U_iso_or_equiv

 _atom_site_adp_type

 _atom_site_occupancy

 _atom_site_symmetry_multiplicity

 _atom_site_calc_flag

 _atom_site_refinement_flags

 _atom_site_disorder_assembly

 _atom_site_disorder_group

N1 N 0.39649(13) 0.0094(2) 0.14807(12) 0.0338(6) Uani 1 1 d . . .

N31 N 0.57447(15) 0.2157(2) 0.07772(14) 0.0453(7) Uani 1 1 d . . .

N32 N 0.66537(17) 0.1001(3) 0.19203(17) 0.0616(9) Uani 1 1 d . . .

N41 N 0.23562(16) 0.2910(2) 0.18119(15) 0.0486(7) Uani 1 1 d . . .

N42 N 0.13572(16) 0.1923(3) 0.06799(15) 0.0549(8) Uani 1 1 d . . .

C1 C 0.39601(18) -0.1096(3) 0.14884(16) 0.0367(8) Uani 1 1 d . . .

C2 C 0.33437(19) -0.1714(3) 0.11881(16) 0.0420(8) Uani 1 1 d . . .

H2 H 0.2915 -0.1320 0.0985 0.050 Uiso 1 1 calc R . .

C3 C 0.3349(2) -0.2889(3) 0.11823(19) 0.0521(10) Uani 1 1 d . . .

H3 H 0.2926 -0.3290 0.0970 0.062 Uiso 1 1 calc R . .

C4 C 0.3957(3) -0.3480(3) 0.1480(2) 0.0624(11) Uani 1 1 d . . .

H4 H 0.3958 -0.4287 0.1480 0.075 Uiso 1 1 calc R . .

C5 C 0.4564(2) -0.2888(3) 0.1778(2) 0.0609(11) Uani 1 1 d . . .

H5 H 0.4987 -0.3294 0.1986 0.073 Uiso 1 1 calc R . .

C6 C 0.4575(2) -0.1716(3) 0.17832(17) 0.0460(9) Uani 1 1 d . . .

H6 H 0.5004 -0.1327 0.1989 0.055 Uiso 1 1 calc R . .

C11 C 0.43469(16) 0.2065(2) 0.17199(15) 0.0328(7) Uani 1 1 d . . .

C12 C 0.47237(16) 0.2961(2) 0.20813(16) 0.0344(7) Uani 1 1 d . . .

H12 H 0.4675 0.3735 0.1864 0.041 Uiso 1 1 calc R . .

C13 C 0.52531(17) 0.2772(3) 0.26977(16) 0.0355(8) Uani 1 1 d . . .

C14 C 0.53726(17) 0.1660(3) 0.29517(16) 0.0393(8) Uani 1 1 d . . .

H14 H 0.5799 0.1534 0.3341 0.047 Uiso 1 1 calc R . .

C15 C 0.50243(17) 0.0692(3) 0.26320(16) 0.0381(8) Uani 1 1 d . . .

H15 H 0.5192 -0.0083 0.2800 0.046 Uiso 1 1 calc R . .

C16 C 0.56422(18) 0.3769(3) 0.30969(17) 0.0445(9) Uani 1 1 d . . .

H16 H 0.6021 0.3450 0.3482 0.053 Uiso 1 1 calc R . .

C17 C 0.5135(2) 0.4473(3) 0.3450(2) 0.0628(11) Uani 1 1 d . . .

H17A H 0.5402 0.5104 0.3710 0.075 Uiso 1 1 calc R . .

H17B H 0.4933 0.3993 0.3778 0.075 Uiso 1 1 calc R . .

H17C H 0.4743 0.4775 0.3089 0.075 Uiso 1 1 calc R . .

C18 C 0.6022(2) 0.4534(3) 0.2649(2) 0.0599(11) Uani 1 1 d . . .

H18A H 0.6264 0.5155 0.2941 0.072 Uiso 1 1 calc R . .

H18B H 0.5668 0.4849 0.2257 0.072 Uiso 1 1 calc R . .

H18C H 0.6380 0.4090 0.2460 0.072 Uiso 1 1 calc R . .

C21 C 0.37962(16) 0.2050(2) 0.10584(15) 0.0322(7) Uani 1 1 d . . .

C22 C 0.35473(16) 0.2918(3) 0.05882(16) 0.0340(7) Uani 1 1 d . . .

H22 H 0.3679 0.3721 0.0726 0.041 Uiso 1 1 calc R . .

C23 C 0.30494(17) 0.2706(3) -0.00410(16) 0.0351(7) Uani 1 1 d . . .

C24 C 0.27924(17) 0.1596(3) -0.01839(16) 0.0381(8) Uani 1 1 d . . .

H24 H 0.2383 0.1494 -0.0593 0.046 Uiso 1 1 calc R . .

C25 C 0.29836(17) 0.0654(3) 0.02578(16) 0.0366(8) Uani 1 1 d . . .

H25 H 0.2730 -0.0091 0.0158 0.044 Uiso 1 1 calc R . .

C26 C 0.28598(19) 0.3617(3) -0.05976(18) 0.0477(9) Uani 1 1 d . . .

H26 H 0.2416 0.3364 -0.0931 0.057 Uiso 1 1 calc R . .

C27 C 0.3452(2) 0.3737(3) -0.10199(19) 0.0648(11) Uani 1 1 d . . .

H27A H 0.3317 0.4321 -0.1383 0.078 Uiso 1 1 calc R . .

H27B H 0.3519 0.3010 -0.1246 0.078 Uiso 1 1 calc R . .

H27C H 0.3901 0.3956 -0.0704 0.078 Uiso 1 1 calc R . .

C28 C 0.2696(2) 0.4775(3) -0.0305(2) 0.0686(12) Uani 1 1 d . . .

H28A H 0.2562 0.5313 -0.0695 0.082 Uiso 1 1 calc R . .

H28B H 0.3125 0.5054 0.0020 0.082 Uiso 1 1 calc R . .

H28C H 0.2298 0.4698 -0.0052 0.082 Uiso 1 1 calc R . .

C31 C 0.65202(19) 0.2010(3) 0.08044(18) 0.0559(10) Uani 1 1 d . . .

H31A H 0.6779 0.2691 0.1022 0.067 Uiso 1 1 calc R . .

H31B H 0.6609 0.1942 0.0317 0.067 Uiso 1 1 calc R . .

C32 C 0.68103(19) 0.0986(3) 0.12164(19) 0.0537(10) Uani 1 1 d . . .

H32A H 0.6597 0.0296 0.0966 0.064 Uiso 1 1 calc R . .

H32B H 0.7338 0.0951 0.1249 0.064 Uiso 1 1 calc R . .

C33 C 0.5331(2) 0.1311(4) 0.03063(19) 0.0696(12) Uani 1 1 d . . .

H33A H 0.5484 0.0547 0.0473 0.083 Uiso 1 1 calc R . .

H33B H 0.5417 0.1417 -0.0174 0.083 Uiso 1 1 calc R . .

H33C H 0.4817 0.1406 0.0306 0.083 Uiso 1 1 calc R . .

C34 C 0.5511(2) 0.3295(4) 0.0527(2) 0.0715(12) Uani 1 1 d . . .

H34A H 0.5782 0.3864 0.0843 0.086 Uiso 1 1 calc R . .

H34B H 0.4996 0.3381 0.0524 0.086 Uiso 1 1 calc R . .

H34C H 0.5600 0.3403 0.0048 0.086 Uiso 1 1 calc R . .

C35 C 0.7144(2) 0.1807(5) 0.2366(2) 0.0966(18) Uani 1 1 d . . .

H35A H 0.7037 0.1818 0.2843 0.116 Uiso 1 1 calc R . .

H35B H 0.7075 0.2570 0.2161 0.116 Uiso 1 1 calc R . .

H35C H 0.7644 0.1568 0.2390 0.116 Uiso 1 1 calc R . .

C36 C 0.6742(3) -0.0110(5) 0.2237(3) 0.139(3) Uani 1 1 d . . .

H36A H 0.6643 -0.0073 0.2716 0.167 Uiso 1 1 calc R . .

H36B H 0.7236 -0.0372 0.2257 0.167 Uiso 1 1 calc R . .

H36C H 0.6405 -0.0641 0.1953 0.167 Uiso 1 1 calc R . .

C41 C 0.1584(2) 0.3096(4) 0.1751(2) 0.0676(12) Uani 1 1 d . . .

H41A H 0.1449 0.3824 0.1503 0.081 Uiso 1 1 calc R . .

H41B H 0.1473 0.3158 0.2230 0.081 Uiso 1 1 calc R . .

C42 C 0.1144(2) 0.2165(4) 0.1361(2) 0.0737(13) Uani 1 1 d . . .

H42A H 0.1202 0.1470 0.1655 0.088 Uiso 1 1 calc R . .

H42B H 0.0629 0.2383 0.1274 0.088 Uiso 1 1 calc R . .

C43 C 0.2615(2) 0.1998(4) 0.2307(2) 0.0764(13) Uani 1 1 d . . .

H43A H 0.2350 0.1298 0.2151 0.092 Uiso 1 1 calc R . .

H43B H 0.2537 0.2205 0.2778 0.092 Uiso 1 1 calc R . .

H43C H 0.3130 0.1877 0.2324 0.092 Uiso 1 1 calc R . .

C44 C 0.2755(3) 0.3944(4) 0.2046(2) 0.0884(15) Uani 1 1 d . . .

H44A H 0.2587 0.4561 0.1714 0.106 Uiso 1 1 calc R . .

H44B H 0.3270 0.3814 0.2065 0.106 Uiso 1 1 calc R . .

H44C H 0.2678 0.4151 0.2517 0.106 Uiso 1 1 calc R . .

C45 C 0.1091(2) 0.2776(4) 0.0147(2) 0.0823(14) Uani 1 1 d . . .

H45A H 0.1273 0.3525 0.0318 0.099 Uiso 1 1 calc R . .

H45B H 0.0563 0.2781 0.0055 0.099 Uiso 1 1 calc R . .

H45C H 0.1258 0.2596 -0.0290 0.099 Uiso 1 1 calc R . .

C46 C 0.1085(3) 0.0805(4) 0.0424(3) 0.0962(16) Uani 1 1 d . . .

H46A H 0.1266 0.0229 0.0781 0.115 Uiso 1 1 calc R . .

H46B H 0.1250 0.0627 -0.0014 0.115 Uiso 1 1 calc R . .

H46C H 0.0557 0.0811 0.0334 0.115 Uiso 1 1 calc R . .

B1 B 0.4453(2) 0.0840(3) 0.19691(18) 0.0352(9) Uani 1 1 d . . .

B2 B 0.35520(19) 0.0829(3) 0.09187(18) 0.0327(9) Uani 1 1 d . . .

Li1 Li 0.5588(3) 0.1690(4) 0.1789(3) 0.0418(13) Uani 1 1 d . . .

Li2 Li 0.2503(3) 0.2130(4) 0.0879(3) 0.0381(13) Uani 1 1 d . . .

C10S C -0.1198(3) 0.2833(4) 0.1281(3) 0.0991(16) Uani 1 1 d . . .

H10A H -0.1399 0.2079 0.1338 0.119 Uiso 1 1 calc R . .

H10B H -0.1516 0.3416 0.1415 0.119 Uiso 1 1 calc R . .

H10C H -0.0720 0.2894 0.1584 0.119 Uiso 1 1 calc R . .

C11S C -0.1134(2) 0.3008(4) 0.0485(3) 0.0832(15) Uani 1 1 d . . .

C12S C -0.1392(3) 0.2221(5) 0.0011(3) 0.0968(16) Uani 1 1 d . . .

H12S H -0.1626 0.1566 0.0145 0.116 Uiso 1 1 calc R . .

C13S C -0.1313(3) 0.2369(6) -0.0680(3) 0.1048(18) Uani 1 1 d . . .

H13S H -0.1480 0.1774 -0.1003 0.126 Uiso 1 1 calc R . .

C14S C -0.1021(3) 0.3287(6) -0.0936(3) 0.0960(17) Uani 1 1 d . . .

H14S H -0.0997 0.3370 -0.1421 0.115 Uiso 1 1 calc R . .

C15S C -0.0769(3) 0.4062(6) -0.0451(5) 0.119(2) Uani 1 1 d . . .

H15S H -0.0542 0.4719 -0.0591 0.143 Uiso 1 1 calc R . .

C16S C -0.0827(3) 0.3948(5) 0.0281(4) 0.1063(18) Uani 1 1 d . . .

H16S H -0.0650 0.4527 0.0613 0.128 Uiso 1 1 calc R . .


loop_

 _atom_site_aniso_label

 _atom_site_aniso_U_11

 _atom_site_aniso_U_22

 _atom_site_aniso_U_33

 _atom_site_aniso_U_23

 _atom_site_aniso_U_13

 _atom_site_aniso_U_12

N1 0.0376(16) 0.0299(14) 0.0342(14) 0.0032(12) 0.0077(12) 0.0007(12)

N31 0.0413(17) 0.0606(19) 0.0346(16) -0.0007(14) 0.0090(13) -0.0051(15)

N32 0.055(2) 0.079(2) 0.056(2) 0.0170(18) 0.0247(17) 0.0258(18)

N41 0.0471(19) 0.0571(19) 0.0436(17) -0.0080(15) 0.0133(14) -0.0002(15)

N42 0.0423(18) 0.079(2) 0.0448(18) -0.0062(16) 0.0114(14) -0.0041(17)

C1 0.048(2) 0.0349(18) 0.0301(17) 0.0012(14) 0.0140(15) 0.0023(16)

C2 0.053(2) 0.0402(19) 0.0370(19) 0.0000(15) 0.0189(17) -0.0030(17)

C3 0.073(3) 0.039(2) 0.048(2) -0.0028(17) 0.022(2) -0.010(2)

C4 0.093(3) 0.032(2) 0.067(3) 0.0007(19) 0.026(2) 0.003(2)

C5 0.070(3) 0.044(2) 0.070(3) 0.011(2) 0.017(2) 0.019(2)

C6 0.055(2) 0.0352(19) 0.049(2) 0.0044(16) 0.0133(18) 0.0076(17)

C11 0.0316(18) 0.0369(18) 0.0295(17) 0.0003(14) 0.0049(14) 0.0019(14)

C12 0.0385(19) 0.0310(17) 0.0344(17) 0.0025(14) 0.0085(15) 0.0024(14)

C13 0.0360(19) 0.0409(19) 0.0288(17) -0.0041(15) 0.0042(15) 0.0015(15)

C14 0.0336(19) 0.054(2) 0.0285(17) 0.0011(16) 0.0026(14) 0.0077(17)

C15 0.045(2) 0.0370(19) 0.0325(17) 0.0049(15) 0.0076(15) 0.0077(16)

C16 0.041(2) 0.050(2) 0.039(2) -0.0039(16) 0.0001(16) -0.0011(17)

C17 0.068(3) 0.064(2) 0.059(2) -0.021(2) 0.018(2) -0.007(2)

C18 0.051(2) 0.056(2) 0.075(3) -0.011(2) 0.015(2) -0.016(2)

C21 0.0311(17) 0.0330(18) 0.0318(17) -0.0011(14) 0.0042(14) 0.0006(14)

C22 0.0317(18) 0.0347(18) 0.0349(18) -0.0024(14) 0.0049(14) -0.0009(14)

C23 0.0356(19) 0.0358(18) 0.0330(18) 0.0022(14) 0.0045(15) 0.0002(15)

C24 0.0328(19) 0.050(2) 0.0302(17) -0.0030(15) 0.0024(14) 0.0009(16)

C25 0.0376(19) 0.0345(18) 0.0388(18) -0.0073(15) 0.0097(15) -0.0029(15)

C26 0.047(2) 0.049(2) 0.042(2) 0.0121(17) -0.0029(17) -0.0064(17)

C27 0.074(3) 0.072(3) 0.047(2) 0.020(2) 0.009(2) -0.013(2)

C28 0.074(3) 0.053(2) 0.074(3) 0.025(2) 0.002(2) 0.012(2)

C31 0.046(2) 0.086(3) 0.037(2) 0.000(2) 0.0131(17) -0.007(2)

C32 0.045(2) 0.069(3) 0.052(2) -0.011(2) 0.0199(18) 0.0031(19)

C33 0.054(3) 0.111(3) 0.044(2) -0.021(2) 0.010(2) -0.017(2)

C34 0.060(3) 0.085(3) 0.071(3) 0.028(2) 0.017(2) 0.005(2)

C35 0.060(3) 0.178(5) 0.046(3) -0.022(3) -0.002(2) 0.038(3)

C36 0.097(4) 0.140(5) 0.203(7) 0.112(5) 0.089(4) 0.074(4)

C41 0.055(3) 0.100(3) 0.053(2) -0.017(2) 0.023(2) 0.014(2)

C42 0.049(3) 0.113(4) 0.064(3) -0.012(3) 0.021(2) -0.005(3)

C43 0.079(3) 0.109(4) 0.044(2) 0.013(2) 0.020(2) 0.018(3)

C44 0.092(4) 0.083(3) 0.097(4) -0.043(3) 0.035(3) -0.015(3)

C45 0.059(3) 0.122(4) 0.063(3) 0.013(3) 0.006(2) 0.028(3)

C46 0.077(3) 0.108(4) 0.106(4) -0.036(3) 0.024(3) -0.040(3)

B1 0.038(2) 0.040(2) 0.029(2) 0.0015(16) 0.0097(17) 0.0031(17)

B2 0.033(2) 0.035(2) 0.033(2) 0.0018(16) 0.0125(17) 0.0015(16)

Li1 0.046(3) 0.045(3) 0.034(3) -0.002(2) 0.008(3) 0.003(3)

Li2 0.038(3) 0.041(3) 0.035(3) 0.000(2) 0.007(2) 0.004(2)

C10S 0.092(4) 0.101(4) 0.105(4) -0.015(3) 0.019(3) 0.007(3)

C11S 0.055(3) 0.055(3) 0.141(5) -0.010(3) 0.023(3) 0.007(2)

C12S 0.083(4) 0.089(4) 0.114(5) -0.012(4) 0.010(3) -0.021(3)

C13S 0.102(4) 0.121(5) 0.096(5) 0.009(4) 0.029(4) 0.004(4)

C14S 0.075(4) 0.121(5) 0.089(4) -0.001(4) 0.008(3) 0.007(4)

C15S 0.097(5) 0.108(5) 0.156(7) 0.043(5) 0.035(5) 0.028(4)

C16S 0.088(4) 0.084(4) 0.145(6) 0.000(4) 0.019(4) 0.006(3)


_geom_special_details

;

 All esds (except the esd in the dihedral angle between two l.s. planes)

 are estimated using the full covariance matrix.  The cell esds are taken

 into account individually in the estimation of esds in distances, angles

 and torsion angles; correlations between esds in cell parameters are only

 used when they are defined by crystal symmetry.  An approximate (isotropic)

 treatment of cell esds is used for estimating esds involving l.s. planes.

;


loop_

 _geom_bond_atom_site_label_1

 _geom_bond_atom_site_label_2

 _geom_bond_distance

 _geom_bond_site_symmetry_2

 _geom_bond_publ_flag

N1 C1 1.402(4) . ?

N1 B1 1.474(4) . ?

N1 B2 1.485(4) . ?

N31 C34 1.463(4) . ?

N31 C33 1.467(4) . ?

N31 C31 1.469(4) . ?

N31 Li1 2.105(6) . ?

N32 C36 1.440(5) . ?

N32 C32 1.446(4) . ?

N32 C35 1.480(5) . ?

N32 Li1 2.144(6) . ?

N41 C44 1.457(5) . ?

N41 C43 1.457(5) . ?

N41 C41 1.461(5) . ?

N41 Li2 2.088(6) . ?

N42 C45 1.455(5) . ?

N42 C46 1.463(5) . ?

N42 C42 1.477(5) . ?

N42 Li2 2.142(6) . ?

C1 C6 1.397(4) . ?

C1 C2 1.401(4) . ?

C2 C3 1.383(4) . ?

C3 C4 1.373(5) . ?

C4 C5 1.371(5) . ?

C5 C6 1.380(5) . ?

C11 C12 1.383(4) . ?

C11 C21 1.483(4) . ?

C11 B1 1.521(5) . ?

C11 Li1 2.368(6) . ?

C12 C13 1.416(4) . ?

C12 Li1 2.365(6) . ?

C13 C14 1.401(4) . ?

C13 C16 1.514(4) . ?

C13 Li1 2.353(6) . ?

C14 C15 1.398(4) . ?

C14 Li1 2.358(6) . ?

C15 B1 1.516(5) . ?

C15 Li1 2.417(6) . ?

C16 C18 1.523(5) . ?

C16 C17 1.527(5) . ?

C21 C22 1.387(4) . ?

C21 B2 1.518(4) . ?

C21 Li2 2.406(6) . ?

C22 C23 1.407(4) . ?

C22 Li2 2.349(6) . ?

C23 C24 1.402(4) . ?

C23 C26 1.511(4) . ?

C23 Li2 2.325(6) . ?

C24 C25 1.403(4) . ?

C24 Li2 2.312(6) . ?

C25 B2 1.514(5) . ?

C25 Li2 2.390(6) . ?

C26 C27 1.516(5) . ?

C26 C28 1.530(5) . ?

C31 C32 1.489(5) . ?

C41 C42 1.489(5) . ?

B1 Li1 2.456(7) . ?

B2 Li2 2.497(6) . ?

C10S C11S 1.578(7) . ?

C11S C12S 1.325(6) . ?

C11S C16S 1.345(7) . ?

C12S C13S 1.382(7) . ?

C13S C14S 1.351(7) . ?

C14S C15S 1.328(8) . ?

C15S C16S 1.444(8) . ?


loop_

 _geom_angle_atom_site_label_1

 _geom_angle_atom_site_label_2

 _geom_angle_atom_site_label_3

 _geom_angle

 _geom_angle_site_symmetry_1

 _geom_angle_site_symmetry_3

 _geom_angle_publ_flag

C1 N1 B1 126.4(3) . . ?

C1 N1 B2 125.9(3) . . ?

B1 N1 B2 107.1(2) . . ?

C34 N31 C33 109.1(3) . . ?

C34 N31 C31 110.8(3) . . ?

C33 N31 C31 110.5(3) . . ?

C34 N31 Li1 117.2(3) . . ?

C33 N31 Li1 104.0(3) . . ?

C31 N31 Li1 104.9(3) . . ?

C36 N32 C32 111.1(4) . . ?

C36 N32 C35 109.2(4) . . ?

C32 N32 C35 109.5(3) . . ?

C36 N32 Li1 114.9(3) . . ?

C32 N32 Li1 104.8(3) . . ?

C35 N32 Li1 107.2(3) . . ?

C44 N41 C43 108.9(3) . . ?

C44 N41 C41 110.5(3) . . ?

C43 N41 C41 111.4(3) . . ?

C44 N41 Li2 119.2(3) . . ?

C43 N41 Li2 99.0(3) . . ?

C41 N41 Li2 107.2(3) . . ?

C45 N42 C46 109.4(3) . . ?

C45 N42 C42 112.2(3) . . ?

C46 N42 C42 109.6(3) . . ?

C45 N42 Li2 104.3(3) . . ?

C46 N42 Li2 116.1(3) . . ?

C42 N42 Li2 105.2(3) . . ?

C6 C1 C2 117.2(3) . . ?

C6 C1 N1 121.3(3) . . ?

C2 C1 N1 121.4(3) . . ?

C3 C2 C1 121.1(3) . . ?

C4 C3 C2 120.7(4) . . ?

C5 C4 C3 118.9(3) . . ?

C4 C5 C6 121.4(4) . . ?

C5 C6 C1 120.7(3) . . ?

C12 C11 C21 130.6(3) . . ?

C12 C11 B1 122.7(3) . . ?

C21 C11 B1 106.7(3) . . ?

C12 C11 Li1 72.9(2) . . ?

C21 C11 Li1 124.7(2) . . ?

B1 C11 Li1 74.8(2) . . ?

C11 C12 C13 121.0(3) . . ?

C11 C12 Li1 73.1(2) . . ?

C13 C12 Li1 72.1(2) . . ?

C14 C13 C12 118.7(3) . . ?

C14 C13 C16 121.1(3) . . ?

C12 C13 C16 120.0(3) . . ?

C14 C13 Li1 72.9(2) . . ?

C12 C13 Li1 73.0(2) . . ?

C16 C13 Li1 128.6(3) . . ?

C15 C14 C13 125.2(3) . . ?

C15 C14 Li1 75.3(2) . . ?

C13 C14 Li1 72.5(2) . . ?

C14 C15 B1 118.4(3) . . ?

C14 C15 Li1 70.7(2) . . ?

B1 C15 Li1 73.3(2) . . ?

C13 C16 C18 114.0(3) . . ?

C13 C16 C17 111.2(3) . . ?

C18 C16 C17 109.9(3) . . ?

C22 C21 C11 130.3(3) . . ?

C22 C21 B2 121.9(3) . . ?

C11 C21 B2 107.6(3) . . ?

C22 C21 Li2 70.8(2) . . ?

C11 C21 Li2 130.4(2) . . ?

B2 C21 Li2 75.3(2) . . ?

C21 C22 C23 121.2(3) . . ?

C21 C22 Li2 75.3(2) . . ?

C23 C22 Li2 71.5(2) . . ?

C24 C23 C22 118.9(3) . . ?

C24 C23 C26 119.8(3) . . ?

C22 C23 C26 120.9(3) . . ?

C24 C23 Li2 71.9(2) . . ?

C22 C23 Li2 73.4(2) . . ?

C26 C23 Li2 132.2(3) . . ?

C23 C24 C25 125.4(3) . . ?

C23 C24 Li2 72.9(2) . . ?

C25 C24 Li2 75.7(2) . . ?

C24 C25 B2 117.4(3) . . ?

C24 C25 Li2 69.6(2) . . ?

B2 C25 Li2 75.8(2) . . ?

C23 C26 C27 110.5(3) . . ?

C23 C26 C28 114.0(3) . . ?

C27 C26 C28 109.9(3) . . ?

N31 C31 C32 112.1(3) . . ?

N32 C32 C31 111.7(3) . . ?

N41 C41 C42 112.5(3) . . ?

N42 C42 C41 111.7(3) . . ?

N1 B1 C15 136.6(3) . . ?

N1 B1 C11 109.6(3) . . ?

C15 B1 C11 113.8(3) . . ?

N1 B1 Li1 127.5(2) . . ?

C15 B1 Li1 70.5(2) . . ?

C11 B1 Li1 68.5(2) . . ?

N1 B2 C25 136.3(3) . . ?

N1 B2 C21 108.9(3) . . ?

C25 B2 C21 114.9(3) . . ?

N1 B2 Li2 133.0(2) . . ?

C25 B2 Li2 68.2(2) . . ?

C21 B2 Li2 68.7(2) . . ?

N31 Li1 N32 84.7(2) . . ?

N31 Li1 C13 131.1(3) . . ?

N32 Li1 C13 120.1(3) . . ?

N31 Li1 C14 165.6(3) . . ?

N32 Li1 C14 102.4(2) . . ?

C13 Li1 C14 34.59(13) . . ?

N31 Li1 C12 106.6(2) . . ?

N32 Li1 C12 152.9(3) . . ?

C13 Li1 C12 34.92(13) . . ?

C14 Li1 C12 61.73(17) . . ?

N31 Li1 C11 102.6(2) . . ?

N32 Li1 C11 167.9(3) . . ?

C13 Li1 C11 62.13(17) . . ?

C14 Li1 C11 72.71(19) . . ?

C12 Li1 C11 33.98(12) . . ?

N31 Li1 C15 155.8(3) . . ?

N32 Li1 C15 105.4(2) . . ?

C13 Li1 C15 62.79(17) . . ?

C14 Li1 C15 34.03(13) . . ?

C12 Li1 C15 74.34(19) . . ?

C11 Li1 C15 64.24(17) . . ?

N31 Li1 B1 121.6(3) . . ?

N32 Li1 B1 131.2(3) . . ?

C13 Li1 B1 75.20(19) . . ?

C14 Li1 B1 62.67(18) . . ?

C12 Li1 B1 63.82(18) . . ?

C11 Li1 B1 36.69(14) . . ?

C15 Li1 B1 36.25(14) . . ?

N41 Li2 N42 84.5(2) . . ?

N41 Li2 C24 168.4(3) . . ?

N42 Li2 C24 102.5(2) . . ?

N41 Li2 C23 133.2(3) . . ?

N42 Li2 C23 118.8(3) . . ?

C24 Li2 C23 35.21(13) . . ?

N41 Li2 C22 107.0(2) . . ?

N42 Li2 C22 150.7(3) . . ?

C24 Li2 C22 62.53(17) . . ?

C23 Li2 C22 35.03(13) . . ?

N41 Li2 C25 151.8(3) . . ?

N42 Li2 C25 107.4(2) . . ?

C24 Li2 C25 34.68(12) . . ?

C23 Li2 C25 63.82(17) . . ?

C22 Li2 C25 75.33(18) . . ?

N41 Li2 C21 101.3(2) . . ?

N42 Li2 C21 171.0(3) . . ?

C24 Li2 C21 72.91(18) . . ?

C23 Li2 C21 61.91(17) . . ?

C22 Li2 C21 33.89(12) . . ?

C25 Li2 C21 64.37(16) . . ?

N41 Li2 B2 118.9(2) . . ?

N42 Li2 B2 135.0(3) . . ?

C24 Li2 B2 62.33(17) . . ?

C23 Li2 B2 74.47(18) . . ?

C22 Li2 B2 63.15(17) . . ?

C25 Li2 B2 36.01(13) . . ?

C21 Li2 B2 36.00(13) . . ?

C12S C11S C16S 119.7(6) . . ?

C12S C11S C10S 119.5(5) . . ?

C16S C11S C10S 120.8(5) . . ?

C11S C12S C13S 118.9(6) . . ?

C14S C13S C12S 125.7(6) . . ?

C15S C14S C13S 114.0(6) . . ?

C14S C15S C16S 122.8(6) . . ?

C11S C16S C15S 118.8(6) . . ?


loop_

 _geom_torsion_atom_site_label_1

 _geom_torsion_atom_site_label_2

 _geom_torsion_atom_site_label_3

 _geom_torsion_atom_site_label_4

 _geom_torsion

 _geom_torsion_site_symmetry_1

 _geom_torsion_site_symmetry_2

 _geom_torsion_site_symmetry_3

 _geom_torsion_site_symmetry_4

 _geom_torsion_publ_flag

B1 N1 C1 C6 -24.4(5) . . . . ?

B2 N1 C1 C6 146.2(3) . . . . ?

B1 N1 C1 C2 156.9(3) . . . . ?

B2 N1 C1 C2 -32.5(4) . . . . ?

C6 C1 C2 C3 -0.3(4) . . . . ?

N1 C1 C2 C3 178.4(3) . . . . ?

C1 C2 C3 C4 0.9(5) . . . . ?

C2 C3 C4 C5 -0.6(5) . . . . ?

C3 C4 C5 C6 -0.1(6) . . . . ?

C4 C5 C6 C1 0.6(6) . . . . ?

C2 C1 C6 C5 -0.4(5) . . . . ?

N1 C1 C6 C5 -179.1(3) . . . . ?

C21 C11 C12 C13 -177.5(3) . . . . ?

B1 C11 C12 C13 2.3(5) . . . . ?

Li1 C11 C12 C13 -56.1(3) . . . . ?

C21 C11 C12 Li1 -121.4(4) . . . . ?

B1 C11 C12 Li1 58.4(3) . . . . ?

C11 C12 C13 C14 -2.2(4) . . . . ?

Li1 C12 C13 C14 -58.8(3) . . . . ?

C11 C12 C13 C16 -178.1(3) . . . . ?

Li1 C12 C13 C16 125.3(3) . . . . ?

C11 C12 C13 Li1 56.6(3) . . . . ?

C12 C13 C14 C15 2.2(5) . . . . ?

C16 C13 C14 C15 178.0(3) . . . . ?

Li1 C13 C14 C15 -56.7(3) . . . . ?

C12 C13 C14 Li1 58.9(3) . . . . ?

C16 C13 C14 Li1 -125.3(3) . . . . ?

C13 C14 C15 B1 -2.0(5) . . . . ?

Li1 C14 C15 B1 -57.5(3) . . . . ?

C13 C14 C15 Li1 55.5(3) . . . . ?

C14 C13 C16 C18 127.8(3) . . . . ?

C12 C13 C16 C18 -56.4(4) . . . . ?

Li1 C13 C16 C18 35.3(4) . . . . ?

C14 C13 C16 C17 -107.3(4) . . . . ?

C12 C13 C16 C17 68.6(4) . . . . ?

Li1 C13 C16 C17 160.3(3) . . . . ?

C12 C11 C21 C22 5.8(5) . . . . ?

B1 C11 C21 C22 -174.0(3) . . . . ?

Li1 C11 C21 C22 -91.2(4) . . . . ?

C12 C11 C21 B2 -178.5(3) . . . . ?

B1 C11 C21 B2 1.7(3) . . . . ?

Li1 C11 C21 B2 84.5(3) . . . . ?

C12 C11 C21 Li2 -93.1(4) . . . . ?

B1 C11 C21 Li2 87.1(3) . . . . ?

Li1 C11 C21 Li2 169.9(3) . . . . ?

C11 C21 C22 C23 175.7(3) . . . . ?

B2 C21 C22 C23 0.5(5) . . . . ?

Li2 C21 C22 C23 -57.2(3) . . . . ?

C11 C21 C22 Li2 -127.2(3) . . . . ?

B2 C21 C22 Li2 57.7(3) . . . . ?

C21 C22 C23 C24 1.3(5) . . . . ?

Li2 C22 C23 C24 -57.7(3) . . . . ?

C21 C22 C23 C26 -171.4(3) . . . . ?

Li2 C22 C23 C26 129.7(3) . . . . ?

C21 C22 C23 Li2 59.0(3) . . . . ?

C22 C23 C24 C25 0.8(5) . . . . ?

C26 C23 C24 C25 173.6(3) . . . . ?

Li2 C23 C24 C25 -57.6(3) . . . . ?

C22 C23 C24 Li2 58.5(3) . . . . ?

C26 C23 C24 Li2 -128.8(3) . . . . ?

C23 C24 C25 B2 -4.4(5) . . . . ?

Li2 C24 C25 B2 -60.9(3) . . . . ?

C23 C24 C25 Li2 56.4(3) . . . . ?

C24 C23 C26 C27 -95.0(4) . . . . ?

C22 C23 C26 C27 77.6(4) . . . . ?

Li2 C23 C26 C27 173.0(3) . . . . ?

C24 C23 C26 C28 140.6(3) . . . . ?

C22 C23 C26 C28 -46.8(4) . . . . ?

Li2 C23 C26 C28 48.6(5) . . . . ?

C34 N31 C31 C32 166.0(3) . . . . ?

C33 N31 C31 C32 -73.0(4) . . . . ?

Li1 N31 C31 C32 38.6(4) . . . . ?

C36 N32 C32 C31 163.1(4) . . . . ?

C35 N32 C32 C31 -76.3(4) . . . . ?

Li1 N32 C32 C31 38.4(4) . . . . ?

N31 C31 C32 N32 -55.0(4) . . . . ?

C44 N41 C41 C42 166.9(4) . . . . ?

C43 N41 C41 C42 -71.8(4) . . . . ?

Li2 N41 C41 C42 35.5(4) . . . . ?

C45 N42 C42 C41 -76.0(4) . . . . ?

C46 N42 C42 C41 162.3(4) . . . . ?

Li2 N42 C42 C41 36.8(4) . . . . ?

N41 C41 C42 N42 -50.8(5) . . . . ?

C1 N1 B1 C15 -6.4(6) . . . . ?

B2 N1 B1 C15 -178.5(4) . . . . ?

C1 N1 B1 C11 172.4(3) . . . . ?

B2 N1 B1 C11 0.4(3) . . . . ?

C1 N1 B1 Li1 95.0(4) . . . . ?

B2 N1 B1 Li1 -77.1(3) . . . . ?

C14 C15 B1 N1 -179.4(3) . . . . ?

Li1 C15 B1 N1 124.3(4) . . . . ?

C14 C15 B1 C11 1.8(4) . . . . ?

Li1 C15 B1 C11 -54.5(3) . . . . ?

C14 C15 B1 Li1 56.2(3) . . . . ?

C12 C11 B1 N1 178.9(3) . . . . ?

C21 C11 B1 N1 -1.3(3) . . . . ?

Li1 C11 B1 N1 -123.6(3) . . . . ?

C12 C11 B1 C15 -2.0(4) . . . . ?

C21 C11 B1 C15 177.8(3) . . . . ?

Li1 C11 B1 C15 55.5(3) . . . . ?

C12 C11 B1 Li1 -57.5(3) . . . . ?

C21 C11 B1 Li1 122.3(3) . . . . ?

C1 N1 B2 C25 6.7(6) . . . . ?

B1 N1 B2 C25 178.8(4) . . . . ?

C1 N1 B2 C21 -171.4(3) . . . . ?

B1 N1 B2 C21 0.7(3) . . . . ?

C1 N1 B2 Li2 110.4(4) . . . . ?

B1 N1 B2 Li2 -77.4(4) . . . . ?

C24 C25 B2 N1 -172.4(3) . . . . ?

Li2 C25 B2 N1 130.0(4) . . . . ?

C24 C25 B2 C21 5.7(4) . . . . ?

Li2 C25 B2 C21 -52.0(3) . . . . ?

C24 C25 B2 Li2 57.6(3) . . . . ?

C22 C21 B2 N1 174.6(3) . . . . ?

C11 C21 B2 N1 -1.5(3) . . . . ?

Li2 C21 B2 N1 -129.8(3) . . . . ?

C22 C21 B2 C25 -4.0(4) . . . . ?

C11 C21 B2 C25 179.9(3) . . . . ?

Li2 C21 B2 C25 51.7(3) . . . . ?

C22 C21 B2 Li2 -55.6(3) . . . . ?

C11 C21 B2 Li2 128.3(3) . . . . ?

C34 N31 Li1 N32 -136.6(3) . . . . ?

C33 N31 Li1 N32 102.9(3) . . . . ?

C31 N31 Li1 N32 -13.3(3) . . . . ?

C34 N31 Li1 C13 -10.7(5) . . . . ?

C33 N31 Li1 C13 -131.2(4) . . . . ?

C31 N31 Li1 C13 112.7(4) . . . . ?

C34 N31 Li1 C14 -15.9(13) . . . . ?

C33 N31 Li1 C14 -136.4(12) . . . . ?

C31 N31 Li1 C14 107.5(12) . . . . ?

C34 N31 Li1 C12 18.2(4) . . . . ?

C33 N31 Li1 C12 -102.3(3) . . . . ?

C31 N31 Li1 C12 141.6(3) . . . . ?

C34 N31 Li1 C11 53.1(3) . . . . ?

C33 N31 Li1 C11 -67.4(3) . . . . ?

C31 N31 Li1 C11 176.5(2) . . . . ?

C34 N31 Li1 C15 106.8(7) . . . . ?

C33 N31 Li1 C15 -13.6(8) . . . . ?

C31 N31 Li1 C15 -129.8(7) . . . . ?

C34 N31 Li1 B1 87.3(4) . . . . ?

C33 N31 Li1 B1 -33.2(4) . . . . ?

C31 N31 Li1 B1 -149.4(3) . . . . ?

C36 N32 Li1 N31 -135.5(4) . . . . ?

C32 N32 Li1 N31 -13.4(3) . . . . ?

C35 N32 Li1 N31 102.9(3) . . . . ?

C36 N32 Li1 C13 89.3(5) . . . . ?

C32 N32 Li1 C13 -148.5(3) . . . . ?

C35 N32 Li1 C13 -32.3(4) . . . . ?

C36 N32 Li1 C14 57.1(4) . . . . ?

C32 N32 Li1 C14 179.3(3) . . . . ?

C35 N32 Li1 C14 -64.4(3) . . . . ?

C36 N32 Li1 C12 107.8(7) . . . . ?

C32 N32 Li1 C12 -130.0(6) . . . . ?

C35 N32 Li1 C12 -13.7(7) . . . . ?

C36 N32 Li1 C11 -7.9(15) . . . . ?

C32 N32 Li1 C11 114.3(13) . . . . ?

C35 N32 Li1 C11 -129.4(13) . . . . ?

C36 N32 Li1 C15 22.1(5) . . . . ?

C32 N32 Li1 C15 144.3(3) . . . . ?

C35 N32 Li1 C15 -99.4(3) . . . . ?

C36 N32 Li1 B1 -7.3(6) . . . . ?

C32 N32 Li1 B1 114.8(4) . . . . ?

C35 N32 Li1 B1 -128.9(4) . . . . ?

C14 C13 Li1 N31 -177.7(4) . . . . ?

C12 C13 Li1 N31 54.0(4) . . . . ?

C16 C13 Li1 N31 -61.2(5) . . . . ?

C14 C13 Li1 N32 -66.4(3) . . . . ?

C12 C13 Li1 N32 165.4(3) . . . . ?

C16 C13 Li1 N32 50.2(4) . . . . ?

C12 C13 Li1 C14 -128.3(3) . . . . ?

C16 C13 Li1 C14 116.6(4) . . . . ?

C14 C13 Li1 C12 128.3(3) . . . . ?

C16 C13 Li1 C12 -115.2(4) . . . . ?

C14 C13 Li1 C11 100.0(2) . . . . ?

C12 C13 Li1 C11 -28.22(17) . . . . ?

C16 C13 Li1 C11 -143.4(3) . . . . ?

C14 C13 Li1 C15 26.36(18) . . . . ?

C12 C13 Li1 C15 -101.9(2) . . . . ?

C16 C13 Li1 C15 142.9(3) . . . . ?

C14 C13 Li1 B1 63.0(2) . . . . ?

C12 C13 Li1 B1 -65.2(2) . . . . ?

C16 C13 Li1 B1 179.6(3) . . . . ?

C15 C14 Li1 N31 142.0(12) . . . . ?

C13 C14 Li1 N31 6.9(12) . . . . ?

C15 C14 Li1 N32 -99.2(3) . . . . ?

C13 C14 Li1 N32 125.7(3) . . . . ?

C15 C14 Li1 C13 135.1(3) . . . . ?

C15 C14 Li1 C12 104.4(2) . . . . ?

C13 C14 Li1 C12 -30.69(18) . . . . ?

C15 C14 Li1 C11 69.4(2) . . . . ?

C13 C14 Li1 C11 -65.7(2) . . . . ?

C13 C14 Li1 C15 -135.1(3) . . . . ?

C15 C14 Li1 B1 31.04(19) . . . . ?

C13 C14 Li1 B1 -104.1(2) . . . . ?

C11 C12 Li1 N31 87.9(3) . . . . ?

C13 C12 Li1 N31 -140.5(3) . . . . ?

C11 C12 Li1 N32 -160.3(6) . . . . ?

C13 C12 Li1 N32 -28.7(6) . . . . ?

C11 C12 Li1 C13 -131.6(3) . . . . ?

C11 C12 Li1 C14 -101.2(2) . . . . ?

C13 C12 Li1 C14 30.41(18) . . . . ?

C13 C12 Li1 C11 131.6(3) . . . . ?

C11 C12 Li1 C15 -66.9(2) . . . . ?

C13 C12 Li1 C15 64.7(2) . . . . ?

C11 C12 Li1 B1 -29.64(18) . . . . ?

C13 C12 Li1 B1 102.0(2) . . . . ?

C12 C11 Li1 N31 -101.1(3) . . . . ?

C21 C11 Li1 N31 26.8(4) . . . . ?

B1 C11 Li1 N31 126.8(3) . . . . ?

C12 C11 Li1 N32 132.7(14) . . . . ?

C21 C11 Li1 N32 -99.4(14) . . . . ?

B1 C11 Li1 N32 0.7(14) . . . . ?

C12 C11 Li1 C13 28.97(18) . . . . ?

C21 C11 Li1 C13 156.9(3) . . . . ?

B1 C11 Li1 C13 -103.1(2) . . . . ?

C12 C11 Li1 C14 64.8(2) . . . . ?

C21 C11 Li1 C14 -167.3(3) . . . . ?

B1 C11 Li1 C14 -67.2(2) . . . . ?

C21 C11 Li1 C12 127.9(3) . . . . ?

B1 C11 Li1 C12 -132.0(3) . . . . ?

C12 C11 Li1 C15 100.4(2) . . . . ?

C21 C11 Li1 C15 -131.7(3) . . . . ?

B1 C11 Li1 C15 -31.68(18) . . . . ?

C12 C11 Li1 B1 132.0(3) . . . . ?

C21 C11 Li1 B1 -100.0(3) . . . . ?

C14 C15 Li1 N31 -158.1(7) . . . . ?

B1 C15 Li1 N31 -28.9(7) . . . . ?

C14 C15 Li1 N32 89.5(3) . . . . ?

B1 C15 Li1 N32 -141.3(3) . . . . ?

C14 C15 Li1 C13 -26.78(18) . . . . ?

B1 C15 Li1 C13 102.4(2) . . . . ?

B1 C15 Li1 C14 129.2(3) . . . . ?

C14 C15 Li1 C12 -62.4(2) . . . . ?

B1 C15 Li1 C12 66.9(2) . . . . ?

C14 C15 Li1 C11 -97.2(2) . . . . ?

B1 C15 Li1 C11 32.05(18) . . . . ?

C14 C15 Li1 B1 -129.2(3) . . . . ?

N1 B1 Li1 N31 32.2(4) . . . . ?

C15 B1 Li1 N31 166.6(3) . . . . ?

C11 B1 Li1 N31 -66.5(3) . . . . ?

N1 B1 Li1 N32 -81.0(4) . . . . ?

C15 B1 Li1 N32 53.3(4) . . . . ?

C11 B1 Li1 N32 -179.8(4) . . . . ?

N1 B1 Li1 C13 161.7(3) . . . . ?

C15 B1 Li1 C13 -63.9(2) . . . . ?

C11 B1 Li1 C13 63.0(2) . . . . ?

N1 B1 Li1 C14 -163.5(3) . . . . ?

C15 B1 Li1 C14 -29.21(17) . . . . ?

C11 B1 Li1 C14 97.7(2) . . . . ?

N1 B1 Li1 C12 126.3(3) . . . . ?

C15 B1 Li1 C12 -99.3(2) . . . . ?

C11 B1 Li1 C12 27.56(17) . . . . ?

N1 B1 Li1 C11 98.8(3) . . . . ?

C15 B1 Li1 C11 -126.9(3) . . . . ?

N1 B1 Li1 C15 -134.3(4) . . . . ?

C11 B1 Li1 C15 126.9(3) . . . . ?

C44 N41 Li2 N42 -137.7(3) . . . . ?

C43 N41 Li2 N42 104.6(3) . . . . ?

C41 N41 Li2 N42 -11.3(3) . . . . ?

C44 N41 Li2 C24 -9.9(16) . . . . ?

C43 N41 Li2 C24 -127.6(14) . . . . ?

C41 N41 Li2 C24 116.5(14) . . . . ?

C44 N41 Li2 C23 -12.7(5) . . . . ?

C43 N41 Li2 C23 -130.4(4) . . . . ?

C41 N41 Li2 C23 113.7(4) . . . . ?

C44 N41 Li2 C22 14.7(4) . . . . ?

C43 N41 Li2 C22 -103.0(3) . . . . ?

C41 N41 Li2 C22 141.1(3) . . . . ?

C44 N41 Li2 C25 105.3(6) . . . . ?

C43 N41 Li2 C25 -12.4(7) . . . . ?

C41 N41 Li2 C25 -128.3(6) . . . . ?

C44 N41 Li2 C21 49.2(4) . . . . ?

C43 N41 Li2 C21 -68.5(3) . . . . ?

C41 N41 Li2 C21 175.6(3) . . . . ?

C44 N41 Li2 B2 82.9(4) . . . . ?

C43 N41 Li2 B2 -34.7(4) . . . . ?

C41 N41 Li2 B2 -150.6(3) . . . . ?

C45 N42 Li2 N41 104.6(3) . . . . ?

C46 N42 Li2 N41 -135.0(3) . . . . ?

C42 N42 Li2 N41 -13.7(3) . . . . ?

C45 N42 Li2 C24 -66.0(3) . . . . ?

C46 N42 Li2 C24 54.4(4) . . . . ?

C42 N42 Li2 C24 175.7(3) . . . . ?

C45 N42 Li2 C23 -32.5(4) . . . . ?

C46 N42 Li2 C23 88.0(4) . . . . ?

C42 N42 Li2 C23 -150.7(3) . . . . ?

C45 N42 Li2 C22 -10.8(6) . . . . ?

C46 N42 Li2 C22 109.6(6) . . . . ?

C42 N42 Li2 C22 -129.1(5) . . . . ?

C45 N42 Li2 C25 -101.6(3) . . . . ?

C46 N42 Li2 C25 18.8(4) . . . . ?

C42 N42 Li2 C25 140.1(3) . . . . ?

C45 N42 Li2 C21 -124.6(17) . . . . ?

C46 N42 Li2 C21 -4.2(19) . . . . ?

C42 N42 Li2 C21 117.2(17) . . . . ?

C45 N42 Li2 B2 -129.2(4) . . . . ?

C46 N42 Li2 B2 -8.8(5) . . . . ?

C42 N42 Li2 B2 112.5(4) . . . . ?

C23 C24 Li2 N41 -3.5(14) . . . . ?

C25 C24 Li2 N41 131.2(14) . . . . ?

C23 C24 Li2 N42 122.8(3) . . . . ?

C25 C24 Li2 N42 -102.5(3) . . . . ?

C25 C24 Li2 C23 134.7(3) . . . . ?

C23 C24 Li2 C22 -30.24(18) . . . . ?

C25 C24 Li2 C22 104.5(2) . . . . ?

C23 C24 Li2 C25 -134.7(3) . . . . ?

C23 C24 Li2 C21 -65.3(2) . . . . ?

C25 C24 Li2 C21 69.4(2) . . . . ?

C23 C24 Li2 B2 -102.6(2) . . . . ?

C25 C24 Li2 B2 32.05(18) . . . . ?

C24 C23 Li2 N41 179.0(4) . . . . ?

C22 C23 Li2 N41 50.1(4) . . . . ?

C26 C23 Li2 N41 -66.8(5) . . . . ?

C24 C23 Li2 N42 -69.5(3) . . . . ?

C22 C23 Li2 N42 161.6(3) . . . . ?

C26 C23 Li2 N42 44.7(4) . . . . ?

C22 C23 Li2 C24 -128.9(3) . . . . ?

C26 C23 Li2 C24 114.1(4) . . . . ?

C24 C23 Li2 C22 128.9(3) . . . . ?

C26 C23 Li2 C22 -117.0(4) . . . . ?

C24 C23 Li2 C25 26.79(18) . . . . ?

C22 C23 Li2 C25 -102.1(2) . . . . ?

C26 C23 Li2 C25 140.9(3) . . . . ?

C24 C23 Li2 C21 100.3(2) . . . . ?

C22 C23 Li2 C21 -28.60(17) . . . . ?

C26 C23 Li2 C21 -145.6(3) . . . . ?

C24 C23 Li2 B2 63.8(2) . . . . ?

C22 C23 Li2 B2 -65.1(2) . . . . ?

C26 C23 Li2 B2 177.9(3) . . . . ?

C21 C22 Li2 N41 85.0(3) . . . . ?

C23 C22 Li2 N41 -144.2(3) . . . . ?

C21 C22 Li2 N42 -165.1(6) . . . . ?

C23 C22 Li2 N42 -34.3(6) . . . . ?

C21 C22 Li2 C24 -100.4(2) . . . . ?

C23 C22 Li2 C24 30.39(18) . . . . ?

C21 C22 Li2 C23 -130.8(3) . . . . ?

C21 C22 Li2 C25 -65.7(2) . . . . ?

C23 C22 Li2 C25 65.1(2) . . . . ?

C23 C22 Li2 C21 130.8(3) . . . . ?

C21 C22 Li2 B2 -29.24(17) . . . . ?

C23 C22 Li2 B2 101.5(2) . . . . ?

C24 C25 Li2 N41 -161.3(6) . . . . ?

B2 C25 Li2 N41 -34.4(6) . . . . ?

C24 C25 Li2 N42 87.0(3) . . . . ?

B2 C25 Li2 N42 -146.1(3) . . . . ?

B2 C25 Li2 C24 126.9(3) . . . . ?

C24 C25 Li2 C23 -27.17(18) . . . . ?

B2 C25 Li2 C23 99.7(2) . . . . ?

C24 C25 Li2 C22 -62.6(2) . . . . ?

B2 C25 Li2 C22 64.3(2) . . . . ?

C24 C25 Li2 C21 -96.9(2) . . . . ?

B2 C25 Li2 C21 29.98(18) . . . . ?

C24 C25 Li2 B2 -126.9(3) . . . . ?

C22 C21 Li2 N41 -103.7(3) . . . . ?

C11 C21 Li2 N41 23.4(4) . . . . ?

B2 C21 Li2 N41 124.2(3) . . . . ?

C22 C21 Li2 N42 126.5(18) . . . . ?

C11 C21 Li2 N42 -106.4(18) . . . . ?

B2 C21 Li2 N42 -5.6(18) . . . . ?

C22 C21 Li2 C24 65.9(2) . . . . ?

C11 C21 Li2 C24 -167.0(3) . . . . ?

B2 C21 Li2 C24 -66.2(2) . . . . ?

C22 C21 Li2 C23 29.52(18) . . . . ?

C11 C21 Li2 C23 156.6(3) . . . . ?

B2 C21 Li2 C23 -102.6(2) . . . . ?

C11 C21 Li2 C22 127.0(4) . . . . ?

B2 C21 Li2 C22 -132.1(3) . . . . ?

C22 C21 Li2 C25 102.1(2) . . . . ?

C11 C21 Li2 C25 -130.8(3) . . . . ?

B2 C21 Li2 C25 -29.99(18) . . . . ?

C22 C21 Li2 B2 132.1(3) . . . . ?

C11 C21 Li2 B2 -100.8(3) . . . . ?

N1 B2 Li2 N41 28.6(5) . . . . ?

C25 B2 Li2 N41 162.2(3) . . . . ?

C21 B2 Li2 N41 -67.8(3) . . . . ?

N1 B2 Li2 N42 -84.8(5) . . . . ?

C25 B2 Li2 N42 48.8(4) . . . . ?

C21 B2 Li2 N42 178.8(4) . . . . ?

N1 B2 Li2 C24 -164.5(3) . . . . ?

C25 B2 Li2 C24 -30.91(18) . . . . ?

C21 B2 Li2 C24 99.0(2) . . . . ?

N1 B2 Li2 C23 159.7(3) . . . . ?

C25 B2 Li2 C23 -66.6(2) . . . . ?

C21 B2 Li2 C23 63.32(19) . . . . ?

N1 B2 Li2 C22 124.0(3) . . . . ?

C25 B2 Li2 C22 -102.3(2) . . . . ?

C21 B2 Li2 C22 27.61(17) . . . . ?

N1 B2 Li2 C25 -133.6(4) . . . . ?

C21 B2 Li2 C25 130.0(3) . . . . ?

N1 B2 Li2 C21 96.4(4) . . . . ?

C25 B2 Li2 C21 -130.0(3) . . . . ?

C16S C11S C12S C13S 2.4(8) . . . . ?

C10S C11S C12S C13S -178.2(5) . . . . ?

C11S C12S C13S C14S -3.3(9) . . . . ?

C12S C13S C14S C15S 3.0(9) . . . . ?

C13S C14S C15S C16S -2.0(9) . . . . ?

C12S C11S C16S C15S -1.5(8) . . . . ?

C10S C11S C16S C15S 179.0(4) . . . . ?

C14S C15S C16S C11S 1.4(9) . . . . ?


_diffrn_measured_fraction_theta_max    0.995

_diffrn_reflns_theta_full              26.41

_diffrn_measured_fraction_theta_full   0.995

_refine_diff_density_max    0.422

_refine_diff_density_min   -0.241

_refine_diff_density_rms    0.044
